# Supplementary material for: The specific vibrational modes of GTP in solution and bound to Ras: a detailed theoretical analysis by QM/MM simulations
Source: Royal Society of Chemistry journal article supplement (doi:10.1039/c1cp22741f), 2011-01-01
Supplement: c1cp22741f.pdf [file c1cp22741f.pdf]

**Supp. Table 1. Comparison of experimental values and calculated frequencies for GTP bound to the Ras protein.**

| Normal Modes                          | Exp. | Pre. Cal. | Aver. | S1   | S2   | S3   | S4   | S5   | S6   |
|---------------------------------------|------|-----------|-------|------|------|------|------|------|------|
| $u_a(\text{PO}_2)_\alpha$             | 1263 | 1259      | 1268  | 1266 | 1260 | 1281 | 1268 | 1266 | 1268 |
| $u_a(\text{PO}_2)_\beta$              | 1219 | 1192      | 1222  | 1215 | 1230 | 1212 | 1221 | 1233 | 1223 |
| $u_a(\text{PO}_3)_\gamma$             | 1157 | 1182      | 1210  | 1209 | 1203 | 1200 | 1216 | 1217 | 1215 |
| $u_a(\text{PO}_3)_\nu$                | 1143 | 1106      | 1138  | 1133 | 1143 | 1143 | 1134 | 1132 | 1146 |
| $u_s(\text{PO}_2)_\beta$              | 1124 | 1063      | 1107  | 1111 | 1101 | 1107 | 1109 | 1110 | 1107 |
| $u_s(\text{PO}_2)_\alpha$             | 1090 | 1048      | 1070  | 1070 | 1064 | 1072 | 1073 | 1075 | 1072 |
| $u_s(\text{PO}_3)_\nu$                | 953  | 973       | 980   | 977  | 978  | 985  | 977  | 974  | 990  |
| $u_s(\text{OP}_\beta\text{O})$        | 895  | 886       | 942   | 936  | 942  | 954  | 938  | 927  | 955  |
| $u_a(\text{OP}_\beta\text{O})$        | 878  | 840       | 877   | 878  | 875  | 880  | 879  | 856  | 895  |
| $u_s(\text{PO})_\alpha$               |      |           | 789   | 787  | 791  | 767  | 785  | 799  | 805  |
| $u_s(\text{P}_\beta\text{OP}_\alpha)$ |      |           | 707   | 706  | 706  | 700  | 710  | 707  | 713  |
| $u_{b1}$                              |      |           | 672   | 671  | 670  | 673  | 671  | 675  | 672  |
| $u_{b2}$                              |      |           | 578   | 580  | 580  | 578  | 577  | 583  | 570  |
| $u_{b3}$                              |      |           | 564   | 570  | 568  | 568  | 568  | 563  | 551  |
| $u_{b4}$                              |      |           | 550   | 557  | 552  | 546  | 548  | 553  | 545  |
| Aver.Devi.                            |      | 28.1      | 20.9  | 18.5 | 19.3 | 21.7 | 19.4 | 21.3 | 25.4 |

The first column lists all the possible normal vibration modes. The first nine vibrations are beyond  $800\text{ cm}^{-1}$  and the last six are below  $800\text{ cm}^{-1}$ , obtained from calculations. The second column shows experimental values (Exp.) obtained from previous studies.<sup>30,32,33</sup> The third column displays previously calculated results (Pre. Cal.).<sup>41</sup> The fourth column presents our calculated average results (Aver.) based on six different snapshots (S1~S6) at 2.0, 2.1, 2.5, 3.0, 10.0 and 100 ps timepoints. The average absolute deviations (Aver. Devi.) relative to available experimental data have been estimated, as shown in the last row. The units of all values are  $\text{cm}^{-1}$ .
